# Supplementary material for: Clinical Symptoms, Radiological Findings and Factors Associated With Endometriosis at the Regional Hospital Bamenda: A Case-Control Study
Source: Research Square preprint supplement (doi:10.21203/rs.3.rs-7743661/v1), 2025-11-11
Supplement: Supplementary file 1 [file 04651d17f56806eabc11f1ea.docx]

**TITLE OF THE STUDY: Clincal symptoms, radiological findings and factors associated with endometriosis at the Regional Hospital Bamenda.**

**QUESTIONNAIRE**

**SECTION 0: IDENTIFICATION**

| S0Q01 | Questionnaire number: |  |
| --- | --- | --- |
| S0Q02 | Date of enrollment: | DD\\MM\\YYYY: ______/______/________ |
| S0Q03 | Participant’s code: | **____________________________** |

**SECTION 1: SOCIO-DEMOGRAPHIC AND INFORMATION (*fill the appropriate number in the bracket)***

| S1Q1 | Age of participant (in years) | ________ |
| --- | --- | --- |
| S1Q2 | Gravidity[[1]](#footnote-1):  Parity[[2]](#footnote-2): | ________  ________ |
| S1Q3 | Marital status:  1 = Single, 2 = Married, 3 = Separated, 4 = Widowed 5= Cohabitation | ( ) |
| S1Q4 | Level of Education:  1 = Not Formal, 2 = Primary, 3 = Secondary 4 = University | ( ) |
| S1Q5 | Employment Status:  1 = Government employed, 2 = Non-Government employed, 3 = Self-employed, 4 = Student, 5 = Retired, 6 = Unemployed | ( ) |
| S1Q6 | Religion  1 = Christian, 2 = Muslim, 3 = Atheist | ( ) |

**SECTION 2: PAST HISTORY**

| S2Q3 | Have you ever undergone any abdominal surgery?  1= Yes 2= No | ( ) |
| --- | --- | --- |
| S2Q5 | Do you have a family history of endometriosis?  1 = Yes, 2 = No, 3= I don’t know | ( ) |

**SECTION 3 : FACTORS ASSOCIATED**

**SUB-SECTION ONE : MENSTRUAL AND REPRODUCTIVE FACTORS**

| S3.1Q1 | Age at first menstrual period(in years) | _________ |
| --- | --- | --- |
| S3.1Q2 | Menstrual cycle length (in days) | _________ |
| S3.1Q3 | Average duration of menstrual bleeding (in days) | _________ |
| S3.1Q4 | Have you ever used hormonal contraceptives?  1= Yes, 2= No | ( ) |
| S3.1Q5 | Infertility [[3]](#footnote-3)  1=Yes , 2= No | ( ) |

**SUB-SECTION TWO: LIFESTYLE AND ENVIRONMENTAL FACTOR**

| S3.2Q1 | Do you drink alcohol? 1 = Yes, 2 = No | ( ) |
| --- | --- | --- |
| S3.2Q2 | Do you engage in physical exercise? 1= Yes, 2= No | ( ) |

**SUB-SECTION THREE: OBESITY (Anthropometric Measures to calculate BMI)**

| S3.3Q1 | Weight in Kg | _________ |
| --- | --- | --- |
| S3.3Q2 | Height in m | _________ |

**SECTION 4: CLINICAL SYMPTOMS**

| S4Q1 | Pelvic pain  1 = Yes, 2 = No  If No go to S3Q3 | ( ) |
| --- | --- | --- |
| S4Q2 | Cyclical pain  1= Yes , 2 = No | ( ) |
| S4Q3 | Non-Cyclical Pain:  1= Yes, 2=No | ( ) |
| S4Q4 | Pain during menses(Dysmenorrhea)  1= Yes, 2=No | ( ) |
| S4Q4 | Pain during sexual intercourse(Dyspareunia)  1=Yes, 2 = No | ( ) |
| S4Q6 | Pain during urination during menses (cyclical dysuria)  1=Yes, 2 = No | ( ) |
| S4Q7 | Blood in urine during menses ( Cyclical Haematuria)  1= Yes, 2= No | ( ) |
| S4Q8 | Pain/or difficulty of passage of stool during menses(cyclical dyschesia)  1= Yes, 2= No | ( ) |
| S4Q9 | Blood in stool during menses 1= Yes, 2= No | ( ) |

**SECTION 5 : RADIOLOGICAL FINDINGS(from radiological report)**

| S5Q1 | Orientation of the uterus  1= Ante-verse 2= retro-verse 3= retroflex | ( ) |
| --- | --- | --- |
| S5Q2 | Adenomyosis 1=Yes, 2=No   1. Diffuse 1= Yes, 2=No 2. Focal adenomyosis 1=Yes, 2= No 3. Cystic adenomyosis 1=Yes , 2= NO | ( )  ( )  ( )  ( ) |
| S5Q3 | Pelvic adhesion 1=Yes, 2=No | ( ) |
| S5Q4 | Free fluid in the pelvis 1= Yes, 2=No | ( ) |
| S5Q5 | Endometrioma 1= Yes , 2= No | ( ) |
| S5Q6 | Peritoneal nodule 1=Yes, 2=No | ( ) |
| S5Q7 | Rectal nodule 1=Yes, 2=No | ( ) |
| S5Q8 | Nodule on the wall of the bladder 1= Yes 2=No | ( ) |

***THANK YOU FOR YOUR PARTICIPATION***

1. *Gravidity : total number of pregnancies*  [↑](#footnote-ref-1)
2. *Parity : number of pregnancies that have reached age of viability* [↑](#footnote-ref-2)
3. *Infertility is the disease of a reproductive system that fails to achieve a pregnancy after one year of regular, unprotected intercourse* [↑](#footnote-ref-3)
